# Supplementary material for: KASL clinical practice guidelines for liver cirrhosis: Ascites and related complications
Source: PubMed Central journal article supplement — Clin Mol Hepatol. 2018 Jul 9;24(3):230–77. doi: 10.3350/cmh.2018.1005 (PMC6166105; doi:10.3350/cmh.2018.1005), 2018-07-09
Supplement: cmh-2018-1005-suppl2.pdf [file cmh-2018-1005-suppl2.pdf]

**Supplementary Table 2.** Diagnostic criteria for HRS of the International Club of Ascites in 2007<sup>263</sup>

---

- 1) Cirrhosis with ascites
  - 2) Serum creatinine >1.5 mg/dL
  - 3) No improvement of serum creatinine (decrease to a level of 1.5 mg/dL) after at least 2 days with diuretic withdrawal and volume expansion with albumin; the recommended dose of albumin is 1 g/kg of body weight per day up to a maximum of 100 g/day
  - 4) Absence of shock
  - 5) No current or recent treatment with nephrotoxic drugs
  - 6) Absence of parenchymal kidney disease as indicated by proteinuria >500 mg/day, microhematuria (>50 red blood cells per high-power field), and/or abnormal renal ultrasonography
- 

HRS, hepatorenal syndrome.
